# Supplementary material for: One-step synthesis of sulfur-containing carbon nanosheets via solution plasma process for enhanced electrochemical catalyst
Source: Royal Society of Chemistry journal article supplement (doi:10.1039/d3nj03539e), 2023-01-01
Supplement: d3nj03539e1.pdf [file d3nj03539e1.pdf]

# One-step synthesis of sulfur-containing carbon nanosheets via solution plasma process for enhanced electrochemical catalyst

Koangyong Hyun<sup>a</sup>, Sangwoo Chae<sup>b\*</sup>

<sup>a</sup>Division of Naval Officer Science, Mokpo National Maritime University, Mokpo, Jeonnam 58628, Korea. (E-mail: kyhyun@mmu.ac.kr)

<sup>b</sup>SIT Research Laboratories, Shibaura Institute of Technology, Tokyo 135-8548, Japan. (E-mail: chae@sic.shibaura-it.ac.jp)

\*Corresponding author.

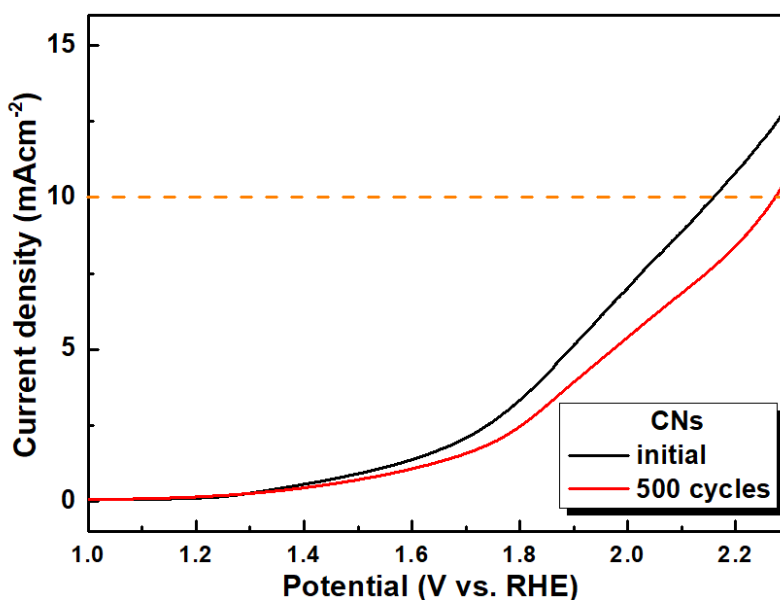

Fig. S1 Durability tests of the CNs by running the OER reaction for 500 cycles.

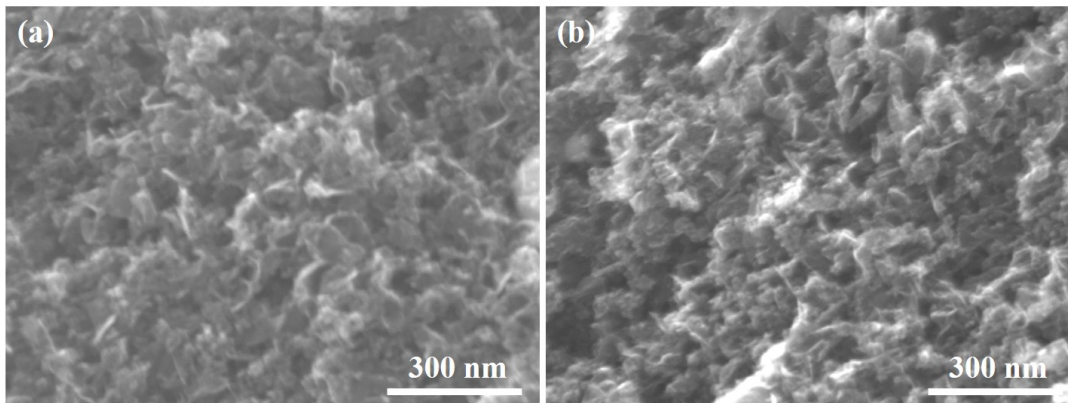

**Fig. S2** SEM images after the durability test of CNs-GT, followed by rinsing with distilled water, for the (a) ORR and (b) OER.

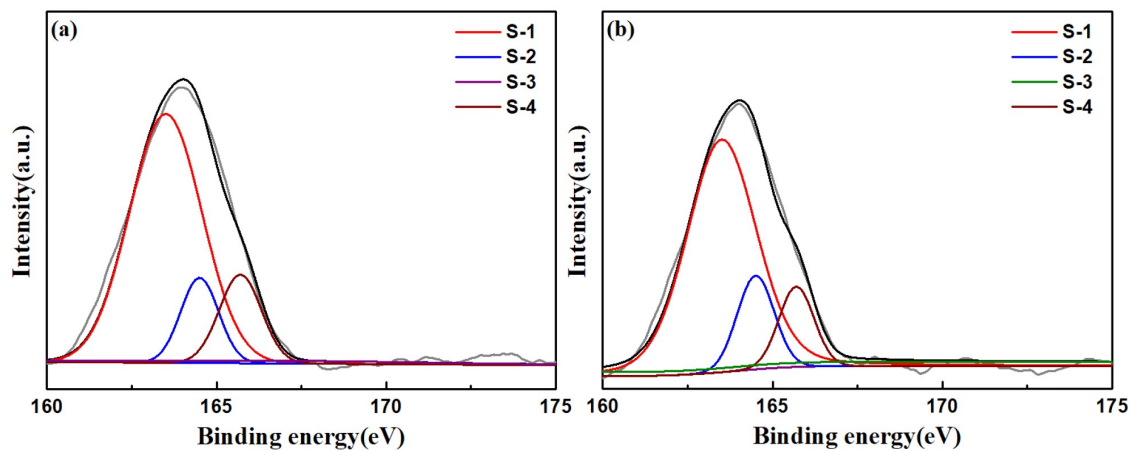

**Fig. S3** XPS spectra of (a) S 2p after the durability test of CNs-GT for the ORR and (b) S 2p after the durability test of CNs-GT for the OER.

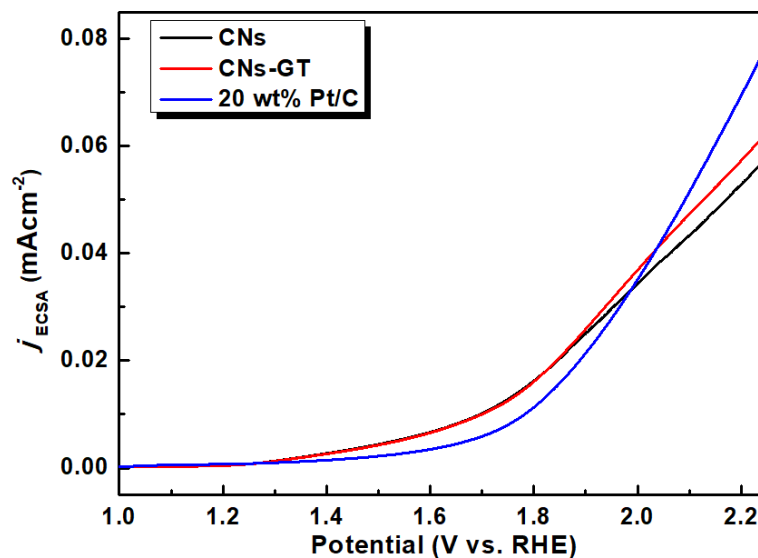

**Fig. S4** ECSA-normalized OER LSV curves of CNs, CNs-GT, and Pt/C.

The ECSA-normalized current density for as prepared catalysts was calculated by

$$\text{ECSA normalized current density } (j_{\text{ECSA}}) = \text{current density} \times C_s / C_{dl}$$

where  $C_s$  is the specific capacitance.<sup>1,2</sup> In this study, a value of  $0.04 \text{ mFcm}^{-2}$  for  $C_s$  was chosen, drawing from previously reported OER catalysts in alkaline solutions.<sup>1,2</sup>

## REFERENCES

- (1) S. Niu, W. J. Jiang, Z. Wei, T. Tang, J. Ma, J. S. Hu and L. J. Wan, *J. Am. Chem. Soc.*, 2019, **141**, 7005–7013.
- (2) C. C. L. McCrory, S. Jung, J. C. Peters and T. F. Jaramillo, *J. Am. Chem. Soc.*, 2013, **135**, 16977–16987.
